# Supplementary material for: Tembusu-Related Flavivirus in Ducks, Thailand
Source: PubMed Central journal article supplement (PMC4672441; doi:10.3201/eid2112.150600), 2015-12
Supplement: 15-0600-Techapp-s1.pdf [file 15-0600-Techapp-s1.pdf]

# Tembusu-Related Flavivirus in Ducks, Thailand

## Technical Appendix

### Methods

#### Outbreak Investigations

During August 2013–September 2014, we investigated outbreaks of a contagious duck disease among ducks characterized by severe neurologic dysfunction and dramatic decreases in egg production in layer and broiler duck farms in Thailand. Epidemiologic information, clinical observations, postmortem examinations, samples collection, and laboratory testing were recorded and analyzed to determine the etiology of the outbreaks.

#### Virus Isolation and Identification

Visceral organ samples were collected from affected ducks, including brain, spinal cord, spleen, lung, kidney, proventriculus, and intestine. Each sample was homogenized in sterile phosphate-buffered saline at a 10% suspension (w/v), centrifuged at  $3,000 \times g$  for 15 min, then filtered through 0.2- $\mu\text{m}$  filters. The filtered suspensions were inoculated into the allantoic cavities of 9-day-old embryonated chicken eggs. The allantoic fluids and tissue suspensions were then examined for the presence of duck Tembusu virus (DTMUV) by reverse transcription PCR (RT-PCR) by using E gene–specific primers (1).

The samples were also tested for avian influenza virus (2), Newcastle disease virus (3,4), and duck herpesvirus (5) to rule out other common viruses that can cause similar symptoms. The tissue suspensions and virus isolates were also tested by hemagglutination tests against 1% chicken erythrocytes at 25°C, pH 7.4 to exclude avian hemagglutinating viruses, including avian influenza virus and Newcastle disease virus.

#### Whole-Genome Sequencing and Phylogenetic Analysis of Thai DTMUV

In this study, 1 DTMUV isolate from Thailand (DK/TH/CU-1) was selected and subjected to whole-genome sequencing. Additionally, 5 other isolates (DK/TH/CU-2,

DK/TH/CU-3, DK/TH/CU-4, DK/TH/CU-5, and DK/TH/CU-6) were subjected to partial E gene sequencing. Viral RNAs were extracted from allantoic fluid by using NucleoSpin Extract Viral RNA Kit (Macherey-Nagel, Düren, Germany) in accordance with the manufacturer's instructions. RT-PCR was performed in a single-step reaction by using the AccessQuick RT-PCR System (Promega, Madison, WI, USA). Primers were designed on the basis of the complete genome sequences of DTMUV available in GenBank. The oligonucleotide primer sequences are shown in online Technical Appendix Table 1. The amplicons were then subjected to DNA sequencing (1st Base Laboratories Sdn Bhd, Malaysia). The validated nucleotide sequences were assembled by using SeqMan software v.5.03 (DNASTAR Inc., Madison, Wisconsin, USA). These nucleotide sequences of the Thai DMTUV were submitted to GenBank under accession nos. KR061333–8.

Phylogenetic analysis was performed by comparing the nucleotide sequences of polyprotein, E gene and NS genes of the Thai DMTUVs with those of other reference flaviviruses available in GenBank. The nucleotide sequences were aligned by using Muscle v.3.6 (7). The phylogenetic trees were constructed in MEGA v.6.0 by using the neighbor-joining and maximum-likelihood algorithms (8). To determine nucleotide identities, the nucleotide sequences of Thai, Malaysian, and Chinese DTMUVs were aligned and compared in MegAlign software v.5.03 (DNASTAR Inc.) with other reference flaviviruses.

## References

1. Su J, Li S, Hu X, Yu X, Wang Y, Liu P, et al. Duck egg-drop syndrome caused by BYD virus, a new Tembusu-related flavivirus. PLoS ONE. 2011;6:e18106. [PubMed](http://dx.doi.org/10.1371/journal.pone.0018106) <http://dx.doi.org/10.1371/journal.pone.0018106>
2. Spackman E, Senne DA, Myers TJ, Bulaga LL, Garber LP, Perdue ML, et al. Development of a real-time reverse transcriptase PCR assay for type A influenza virus and the avian H5 and H7 hemagglutinin subtypes. J Clin Microbiol. 2002;40:3256–60. [PubMed](http://dx.doi.org/10.1128/JCM.40.9.3256-3260.2002) <http://dx.doi.org/10.1128/JCM.40.9.3256-3260.2002>
3. Ke GM, Yu SW, Ho CH, Chu PY, Ke LY, Lin KH, et al. Characterization of newly emerging Newcastle disease viruses isolated during 2002–2008 in Taiwan. Virus Res. 2010;147:247–57. [PubMed](http://dx.doi.org/10.1016/j.virusres.2009.11.008) <http://dx.doi.org/10.1016/j.virusres.2009.11.008>

4. Liu H, Wang Z, Wu Y, Zheng D, Sun C, Bi D, et al. Molecular epidemiological analysis of Newcastle disease virus isolated in China in 2005. *J Virol Methods*. 2007;140:206–11. [PubMed](#)  
<http://dx.doi.org/10.1016/j.jviromet.2006.10.012>
5. Li H, Liu S, Kong X. Characterization of the genes encoding UL24, TK and gH proteins from duck enteritis virus (DEV): a proof for the classification of DEV. *Virus Genes*. 2006;33:221–7.  
[PubMed](#) <http://dx.doi.org/10.1007/s11262-005-0060-6>
9. Huang X, Han K, Zhao D, Liu Y, Zhang J, Niu H, et al. Identification and molecular characterization of a novel flavivirus isolated from geese in China. *Res Vet Sci*. 2013;94:774–80. [PubMed](#)  
<http://dx.doi.org/10.1016/j.rvsc.2012.11.014>
7. Edgar RC. MUSCLE: a multiple sequence alignment method with reduced time and space complexity. *BMC Bioinformatics*. 2004;5:113. [PubMed](#) <http://dx.doi.org/10.1186/1471-2105-5-113>
8. Tamura K, Peterson D, Peterson N, Stecher G, Nei M, Kumar S. MEGA5: molecular evolutionary genetics analysis using maximum likelihood, evolutionary distance, and maximum parsimony methods. *Mol Biol Evol*. 2011;28:2731–9. [PubMed](#) <http://dx.doi.org/10.1093/molbev/msr121>

**Technical Appendix Table 1.** Primers used for whole-genome sequencing of a Thai duck Tembusu virus

| Primer name | Sequence (5'→3')        | Reference  |
|-------------|-------------------------|------------|
| P1f         | AGAAGTTCRYCTGTGTGA      | (6)        |
| DF_R638     | CAGCAGTCTATGTCTTCAGG    | This study |
| DF_F441     | CGATAGTTGCTGGGCTGAAGC   | This study |
| DF_R1115    | GCAGTAAGATCTCACAACCGC   | This study |
| DF_F954     | GCTTCAGCTGTCTGGGGATGC   | This study |
| DF_R1650    | CAATGACTCTTTGTTTTGCCACG | This study |
| DF_F1480    | CTACACYGCTGAGATGGAGG    | This study |
| DF_R2463    | GCCAAGTCGATTGAGCACCCC   | This study |
| DF_F2353    | GGCACTGCTATTGTGGATGGG   | This study |
| DF_R3339    | GGTGGGGTGGTGCAAGACC     | This study |
| DF_F3302    | GGAACAACCTGCACAGTAACG   | This study |
| DF_R4694    | GCATGACTCCCACTCCAGCC    | This study |
| DF_F4406    | GCATCACAGAGATTTGATGTGG  | This study |
| DF_R5162    | CCTGAACCTGGATGTAGGTCC   | This study |
| DF_F4874    | GCAAGTCATCGTCGTGCAACC   | This study |
| DF_R5582    | GCTCTTCAATGTCTGTTATTGGC | This study |
| DF_F5399    | GCTCACACCTCAGCGAGTGC    | This study |
| DF_R6249    | GGTCATTGTAACCTATCCCAGC  | This study |
| DF_F5928    | CCAGTTCCTATAACATCAGCC   | This study |
| DF_R6678    | GCTCCAAGACCTGTCTTCCC    | This study |
| DF_F6494    | CGCTCACAGAATGACAGAATCC  | This study |
| DF_R7348    | GGAACATCTGTAGCCACTATGC  | This study |
| DF_F6807    | GAACCAGAGAGACAGAGATCGC  | This study |
| DF_R8158    | CCCTAGCTAGCCATTCTCGG    | This study |
| DF_F7940    | GCAGGTTCAAGGAAGTGAGAGG  | This study |
| DF_R8536    | GGATTGTCTTGGTCATAATGCC  | This study |
| DF_F8383    | GGATGCACAAAACCAACCGC    | This study |
| DF_R9215    | GGCCGAGATGTCACGCAGC     | This study |
| DF_F8084    | GCTGTGTGACATAGGTGAAGC   | This study |
| DF_R9449    | CCACTTCCCCTCTGGTCTTCC   | This study |
| DF_F9274    | GGGACACTAGAATAACCAAGGC  | This study |
| DF_R10485   | CCAACATCCGGTGGCAGGG     | This study |

**Technical Appendix Table 2.** Nucleotide identities of the polyprotein gene sequences of a Thai DTMUV (DK/TH/CU-1) with reference viruses of Ntaya virus group

|            | DK/TH/CU-1 | WFZ_2012 | CJD05 | xz_2012 | YY5  | goose | pigeon | DEDSV- |       |        |      |      |      |      |      |      | ITV  | ROCV | ILHV | ZIKV |
|------------|------------|----------|-------|---------|------|-------|--------|--------|-------|--------|------|------|------|------|------|------|------|------|------|------|
|            |            |          |       |         |      |       |        | byd1   | BYD-1 | MM1775 | STWV | NTAV | BAGV |      |      |      |      |      |      |      |
| DK/TH/CU-1 | 100        | 97.7     | 97.6  | 97.7    | 97.9 | 97.8  | 97.9   | 97.9   | 97.9  | 90.3   | 89.4 | 76.9 | 76.7 | 77   | 69.4 | 68.8 | 65.2 |      |      |      |
| WFZ_2012   |            |          | 99.1  | 99.2    | 99.4 | 99.3  | 99.3   | 99.4   | 99.4  | 90.6   | 89.4 | 76.9 | 76.5 | 77   | 69.4 | 68.6 | 65.2 |      |      |      |
| CJD05      |            |          |       | 99.1    | 99.3 | 99.2  | 99.3   | 99.4   | 99.4  | 90.6   | 89.3 | 76.9 | 76.5 | 76.8 | 69.3 | 68.6 | 65.3 |      |      |      |
| xz_2012    |            |          |       |         | 99.4 | 99.3  | 99.3   | 99.4   | 99.4  | 90.7   | 89.5 | 77   | 76.5 | 76.8 | 69.3 | 68.7 | 65.4 |      |      |      |
| YY5        |            |          |       |         |      | 99.5  | 99.6   | 99.6   | 99.6  | 90.7   | 89.5 | 77   | 76.6 | 76.9 | 69.4 | 68.7 | 65.3 |      |      |      |
| goose      |            |          |       |         |      |       | 99.9   | 99.6   | 99.6  | 90.6   | 89.5 | 77   | 76.5 | 76.8 | 69.4 | 68.7 | 65.3 |      |      |      |
| pigeon     |            |          |       |         |      |       |        | 99.6   | 99.6  | 90.7   | 89.5 | 77   | 76.5 | 76.9 | 69.4 | 68.7 | 65.3 |      |      |      |
| DEDSV-byd1 |            |          |       |         |      |       |        |        | 100   | 90.7   | 89.5 | 77   | 76.6 | 76.9 | 69.4 | 68.7 | 65.3 |      |      |      |
| BYD-1      |            |          |       |         |      |       |        |        |       | 90.7   | 89.5 | 77   | 76.6 | 76.9 | 69.4 | 68.7 | 65.3 |      |      |      |
| MM1775     |            |          |       |         |      |       |        |        |       |        | 94   | 76.5 | 76.6 | 76.9 | 69.3 | 68.6 | 65.1 |      |      |      |
| STWV       |            |          |       |         |      |       |        |        |       |        |      | 76.5 | 76.5 | 76.8 | 69.2 | 68.4 | 65.1 |      |      |      |
| NTAV       |            |          |       |         |      |       |        |        |       |        |      |      | 79.9 | 80.2 | 69   | 68.5 | 65.2 |      |      |      |
| BAGV       |            |          |       |         |      |       |        |        |       |        |      |      |      | 94.9 | 69.3 | 69.1 | 65.2 |      |      |      |
| ITV        |            |          |       |         |      |       |        |        |       |        |      |      |      |      | 69.6 | 69.1 | 65.2 |      |      |      |
| ROCV       |            |          |       |         |      |       |        |        |       |        |      |      |      |      |      | 74.9 | 65.4 |      |      |      |
| ILHV       |            |          |       |         |      |       |        |        |       |        |      |      |      |      |      |      | 65.4 |      |      |      |
| ZIKV       |            |          |       |         |      |       |        |        |       |        |      |      |      |      |      |      |      | 100  |      |      |

\*BAGV, Bagaza virus; DK/TH/CU-1, Thai duck tembusu virus; ILHV, Ilheus virus; ITV, Israel turkey meningoencephalomyelitis virus; WFZ\_2012, CJD05, xz\_2012, YY5, goose, pigeon, DEDSV-byd1, BYD-1, Chinese duck tembusu viruses; MM1775, Tembusu virus strain MM1775; NTAV, Ntaya virus; ROCV, Rocio virus; STWV, Sitiawan virus; ZIKV, Zika virus.

**A**

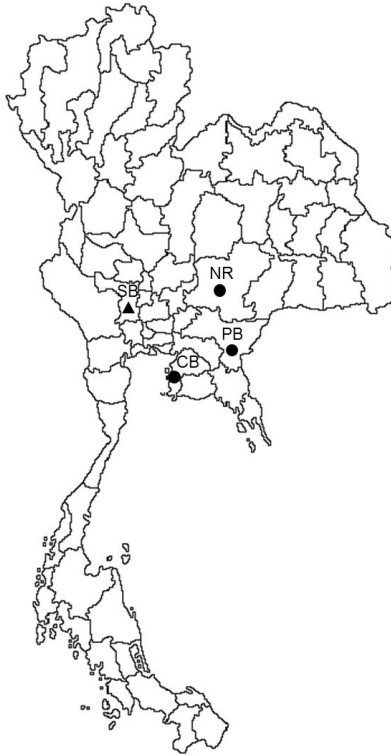

**B**

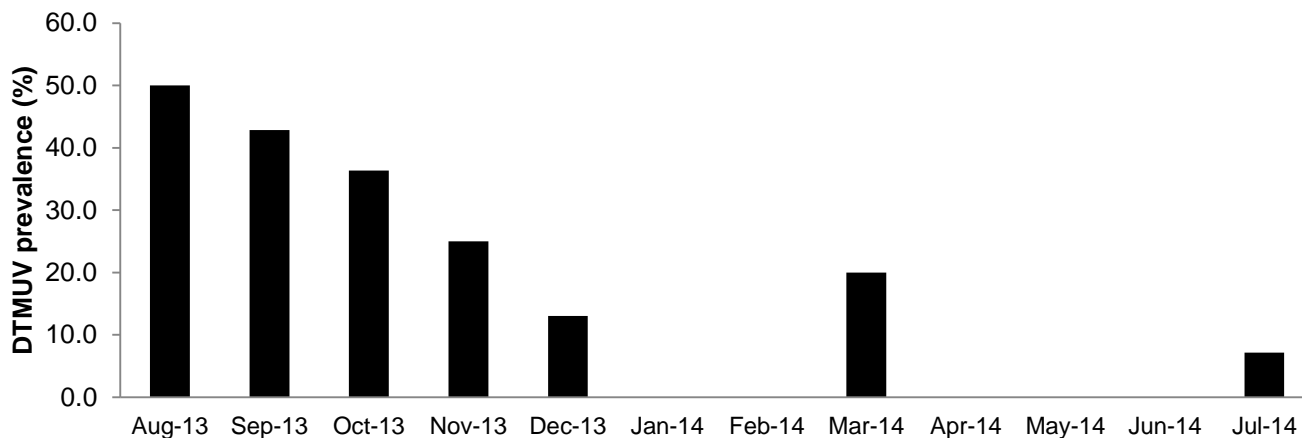

**Technical Appendix Figure 1.** Details of DTMUV outbreaks in Thailand during 2013–2014. A) Locations of DTMUV outbreaks in Thailand. Circles represent provinces where the DMTUV isolated. NR, Nakhon Ratchasima; PC, Prachinburi; CB, Chonburi; SB, Suphanburi. B) Monthly prevalence of DTMUV in farmed ducks, Thailand, 2013–2014. DTMUV, duck Tembusu virus.

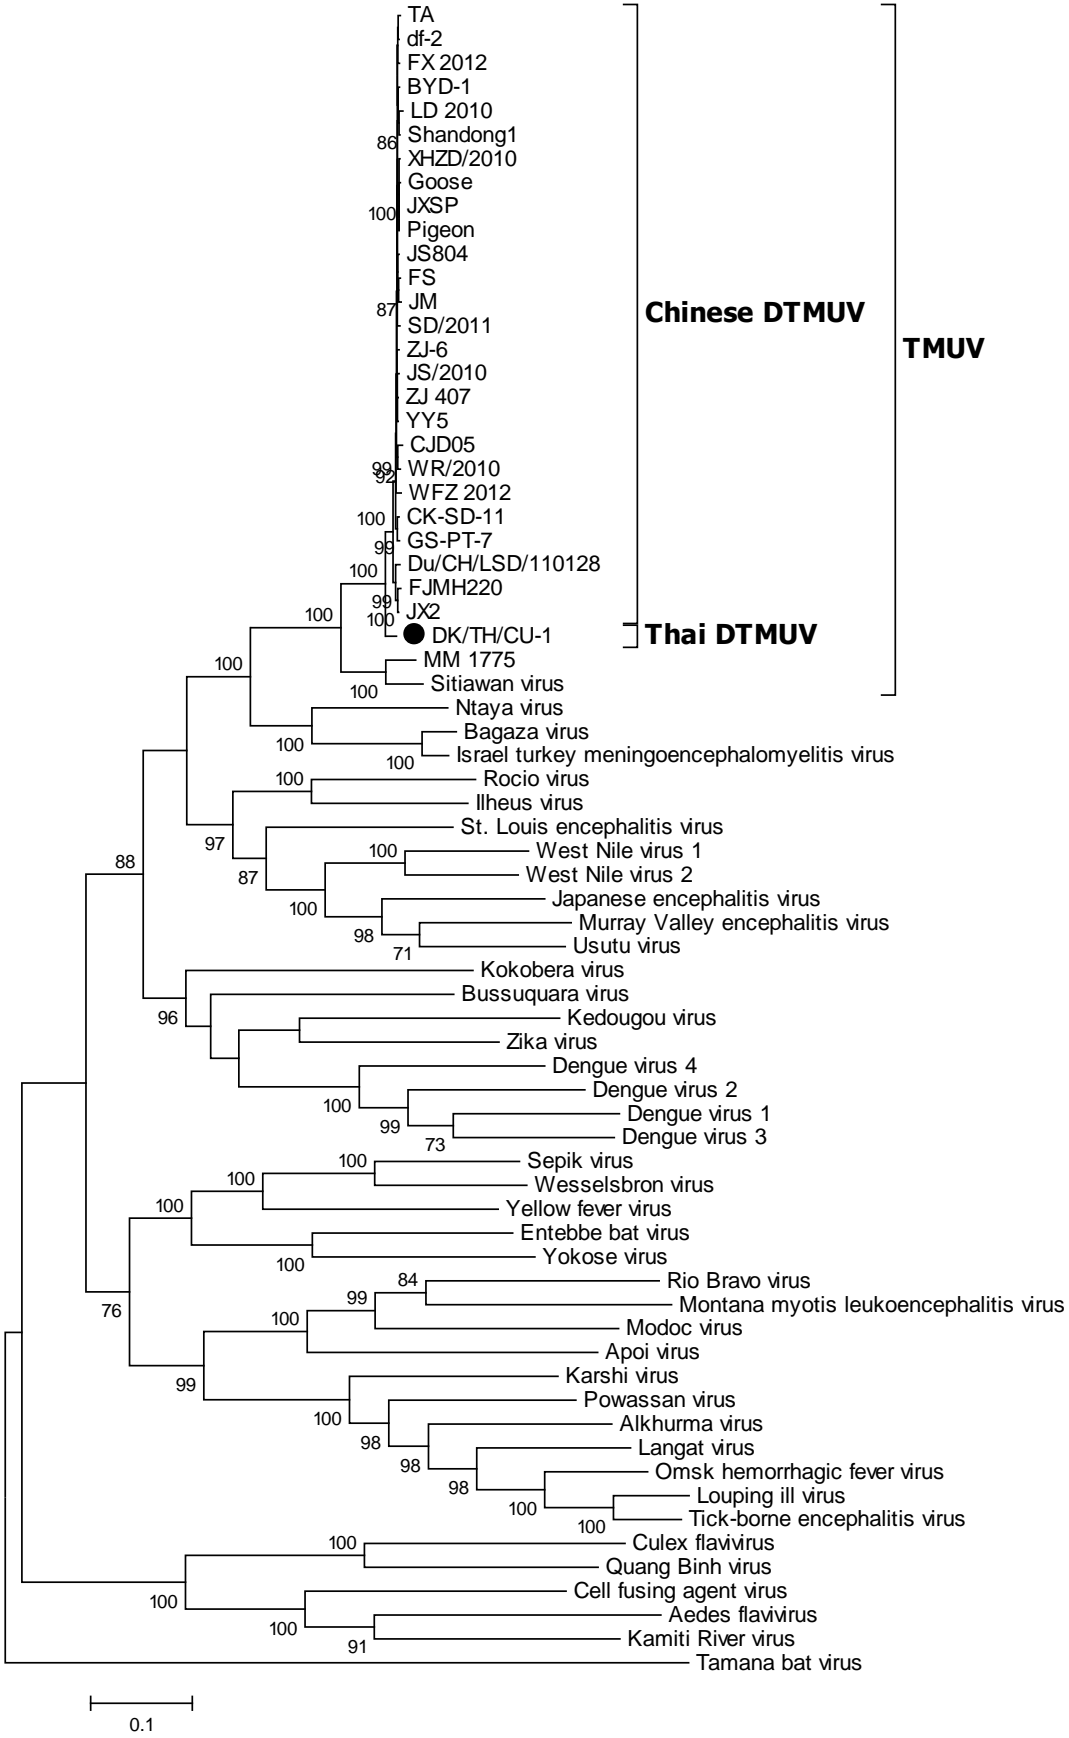

Partial E gene

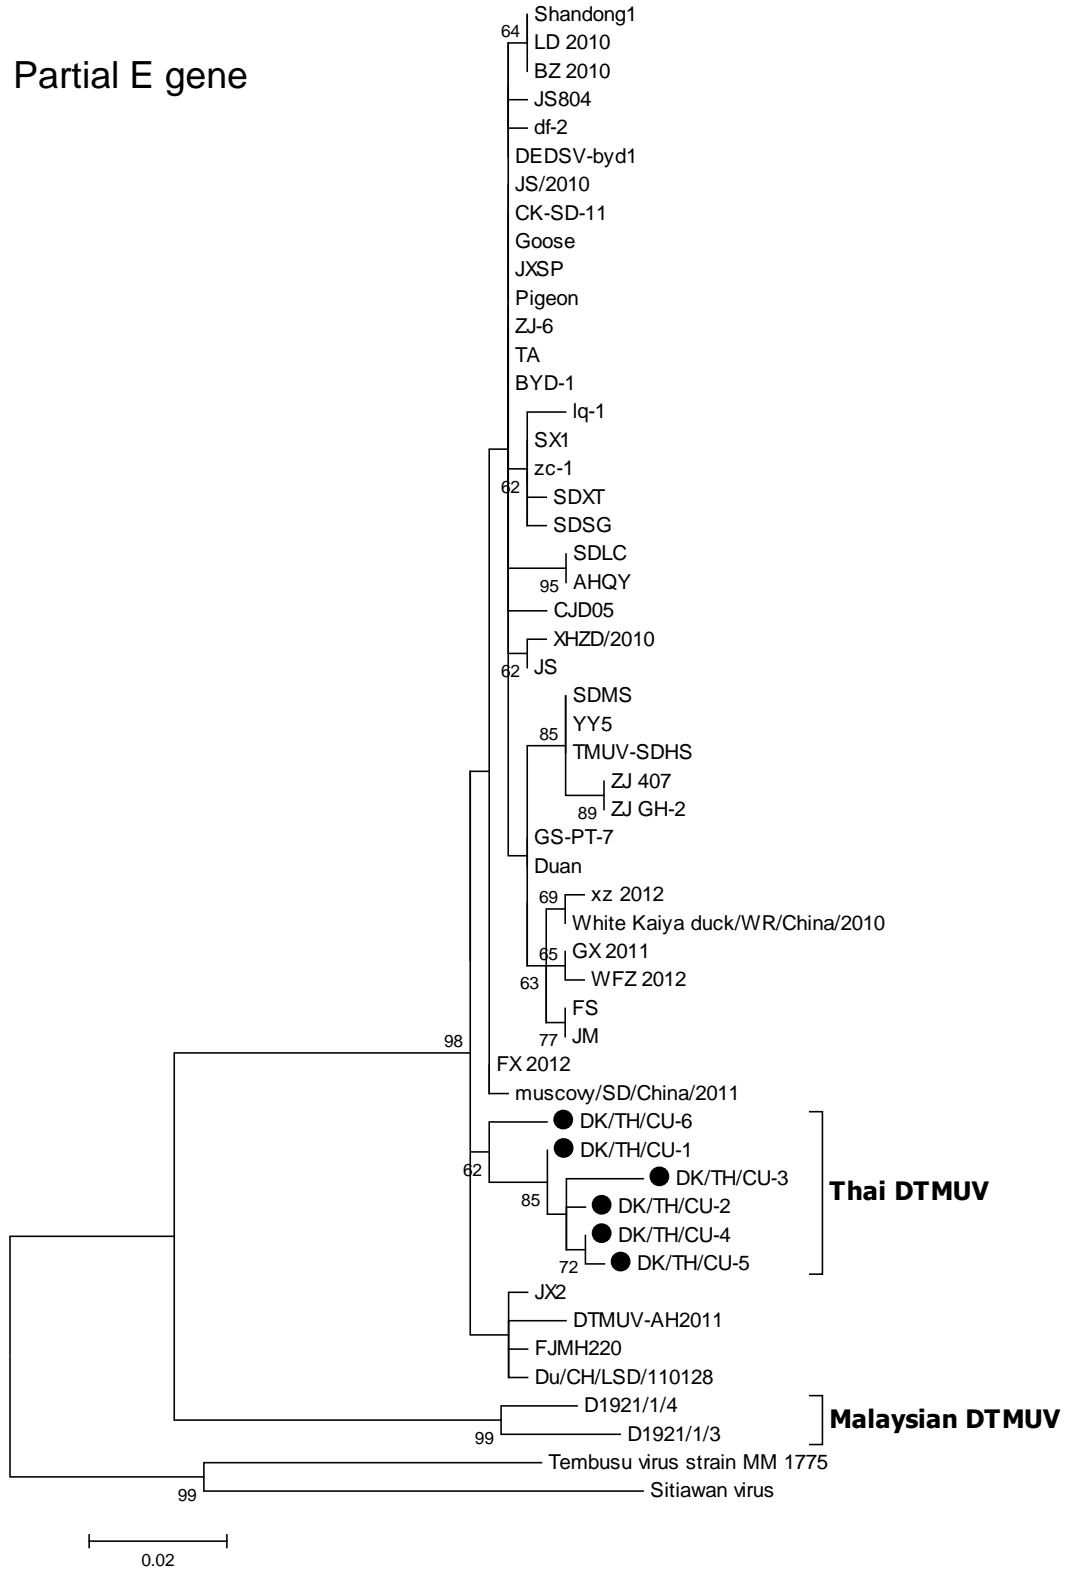

## NS5 gene

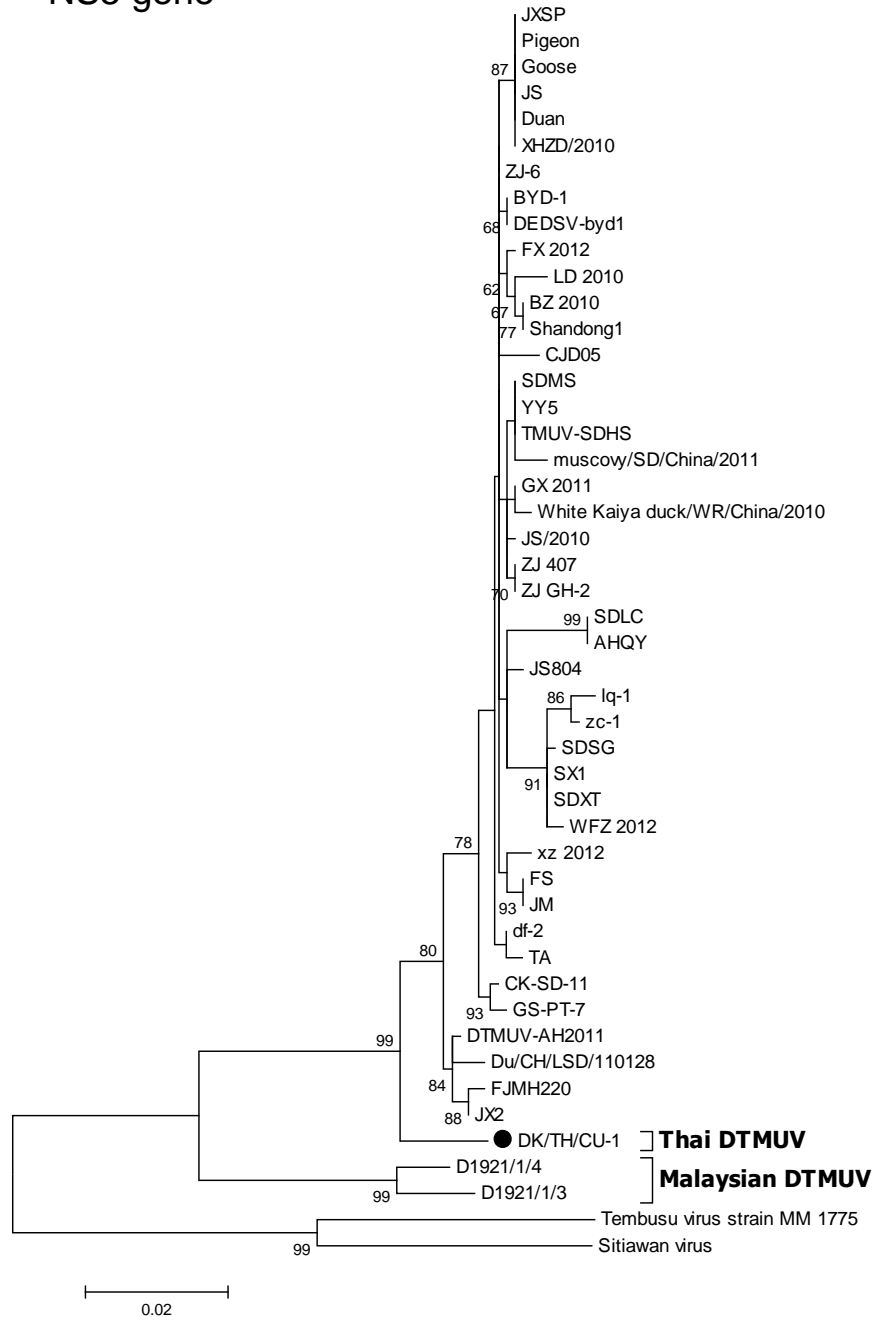

**Technical Appendix Figure 2.** Phylogenetic analysis of the nucleotide sequences of polyprotein gene (10,278 bp), partial E gene (361 bp), and partial NS gene (900 bp) of Thai DTMUVs and selected reference strains of flaviviruses. The nucleotide sequences were aligned by using Muscle v.3.6 (7). The phylogenetic trees were constructed in MEGA v.6.0 by using the maximum-likelihood algorithm with the Hasegawa-Kishino-Yano (HKY) model applied to 500 replications of bootstrap (8). Circle indicates Thai DTMUVs.
